# Supplementary material for: IL-4Rα Blockade by Dupilumab Decreases Staphylococcus aureus Colonization and Increases Microbial Diversity in Atopic Dermatitis
Source: PubMed Central journal article supplement — J Invest Dermatol. Author manuscript; Available in PMC 2020 Apr 17. (PMC7163930; doi:10.1016/j.jid.2019.05.024), 2019-06-25
Supplement: NIHMS1575018-supplement-1.pdf [file NIHMS1575018-supplement-1.pdf]

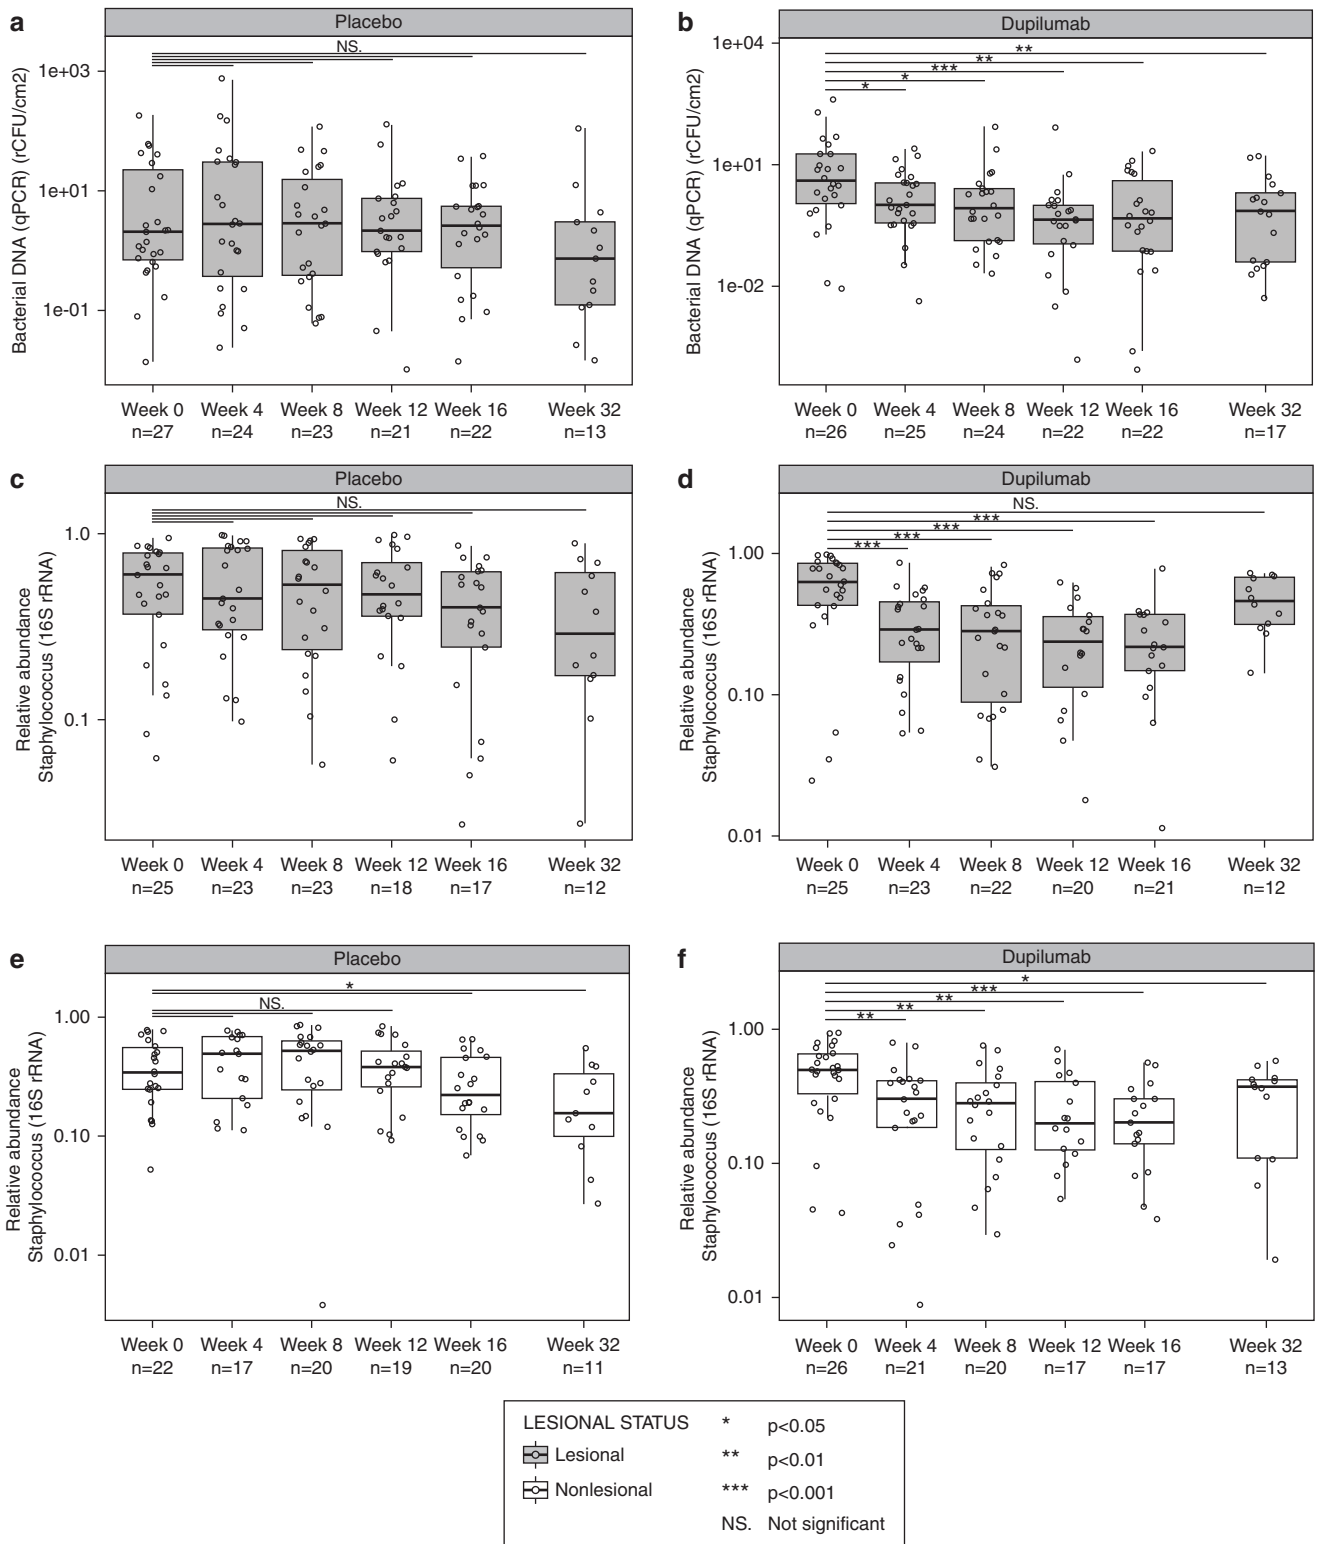

**Supplementary Figure S1.** Absolute abundance of total bacteria in lesional skin samples from the (a) placebo group and (b) dupilumab-treated group. Relative abundance of *Staphylococcus* over time in lesional skin samples in the (c) placebo group and (d) dupilumab-treated group. Relative abundance of *Staphylococcus* over time in nonlesional skin samples in the (e) placebo group and (f) dupilumab-treated group. Changes in abundance from baseline were assessed using the nonparametric Mann–Whitney U test, with Bonferroni correction for multiple comparison. qPCR, quantitative PCR; rCFU, relative colony-forming units; rRNA, ribosomal RNA.

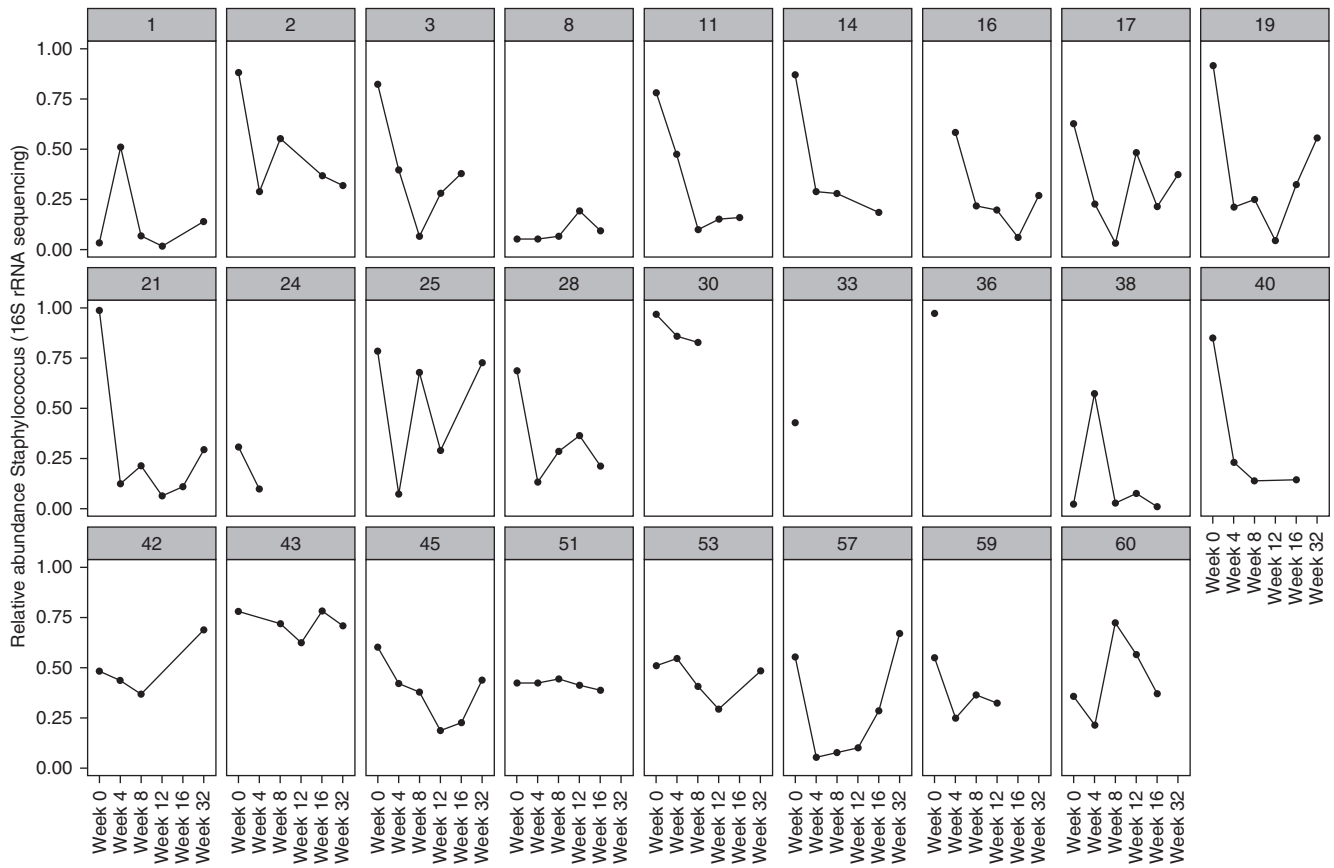

Supplementary Figure S2. Relative abundance of *Staphylococcus* in individual patients over time in lesional skin (dupilumab-treated group). Only patients receiving active treatment were included; some patient dropout is noted. rRNA, ribosomal RNA.

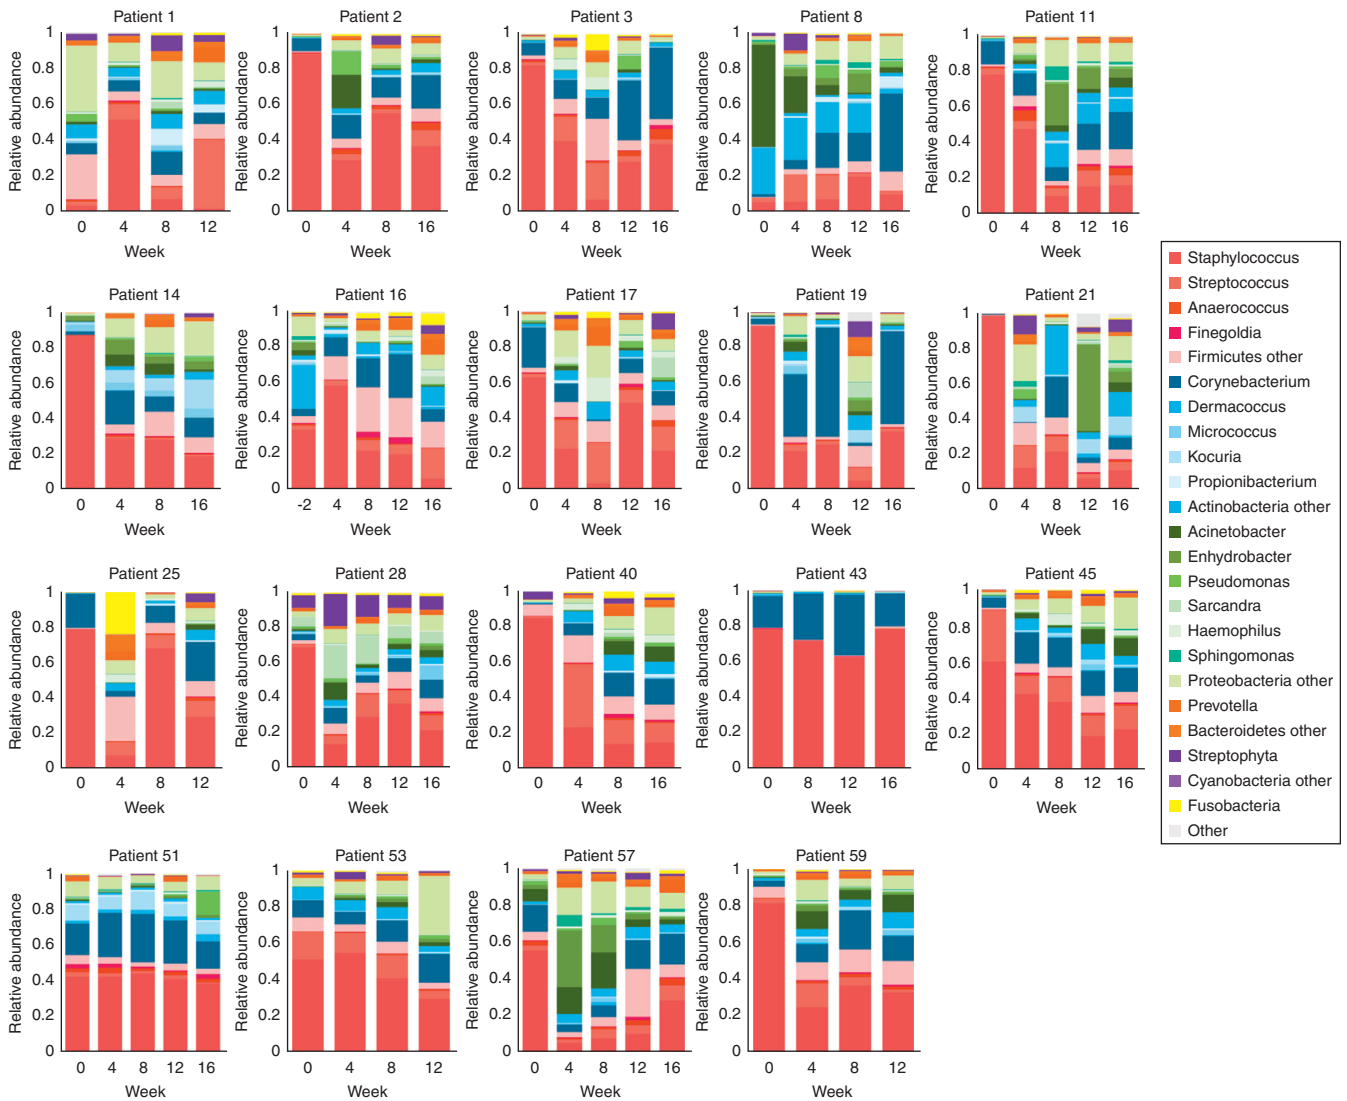

**Supplementary Figure S3.** Relative abundance of bacterial taxonomic distribution of individual patients over time in lesional skin (dupilumab-treated group). Only weeks 0, 4, 8, 12, and 16 are shown for simplicity.

**Supplementary Figure S4.**  $\beta$ -Diversity (PCoA) plot color-coded per week number of the (a) dupilumab-treated group of lesional skin (small dots represent nonlesional skin samples); (b) dupilumab-treated group of nonlesional skin (small dots represent lesional skin samples); (c) placebo group of lesional skin (small dots represent nonlesional skin samples); and (d) placebo group of nonlesional skin (small dots represent lesional skin samples). Each dot represents a different sample. PCoA, principal coordinates analysis.

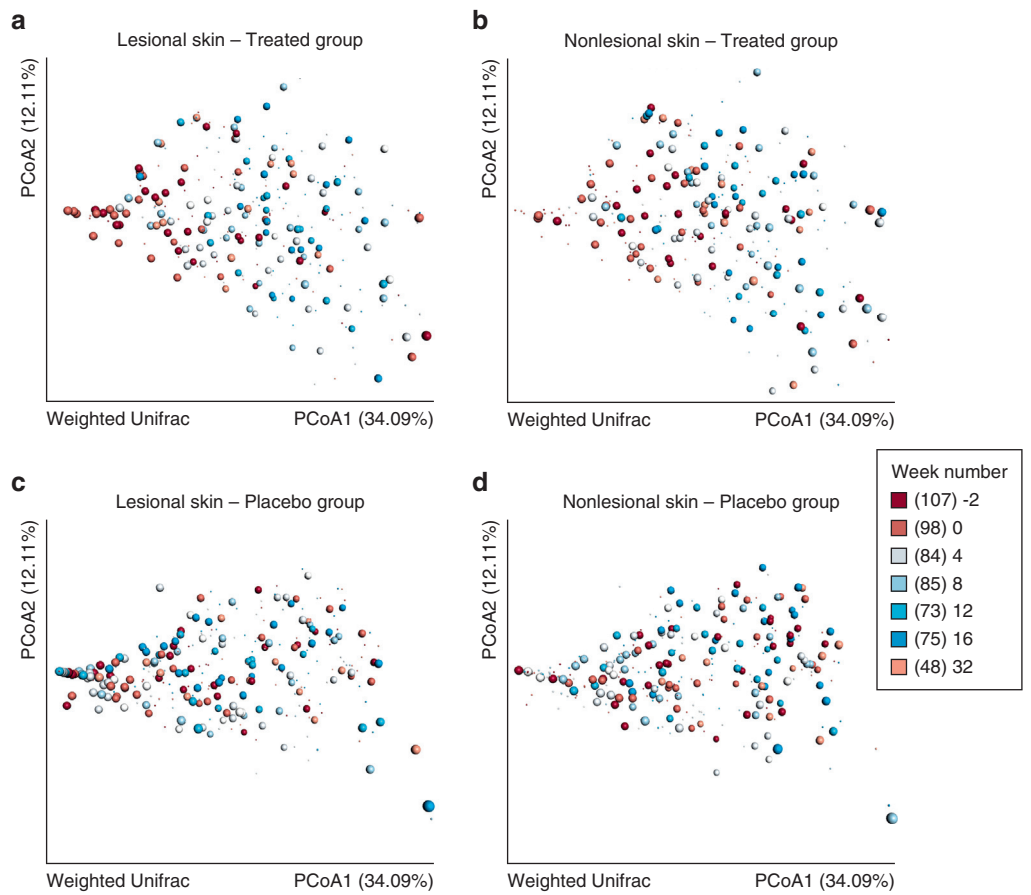

**Supplementary Figure S5.** Absolute abundance of *Staphylococcus aureus* per week in lesional skin samples in dupilumab-treated group (group B) and placebo group (group A). Statistical differences between treatment groups at each time point were assessed using the nonparametric Mann–Whitney U test, with Bonferroni correction for multiple comparison. qPCR, quantitative PCR; rCFU, relative colony-forming units.

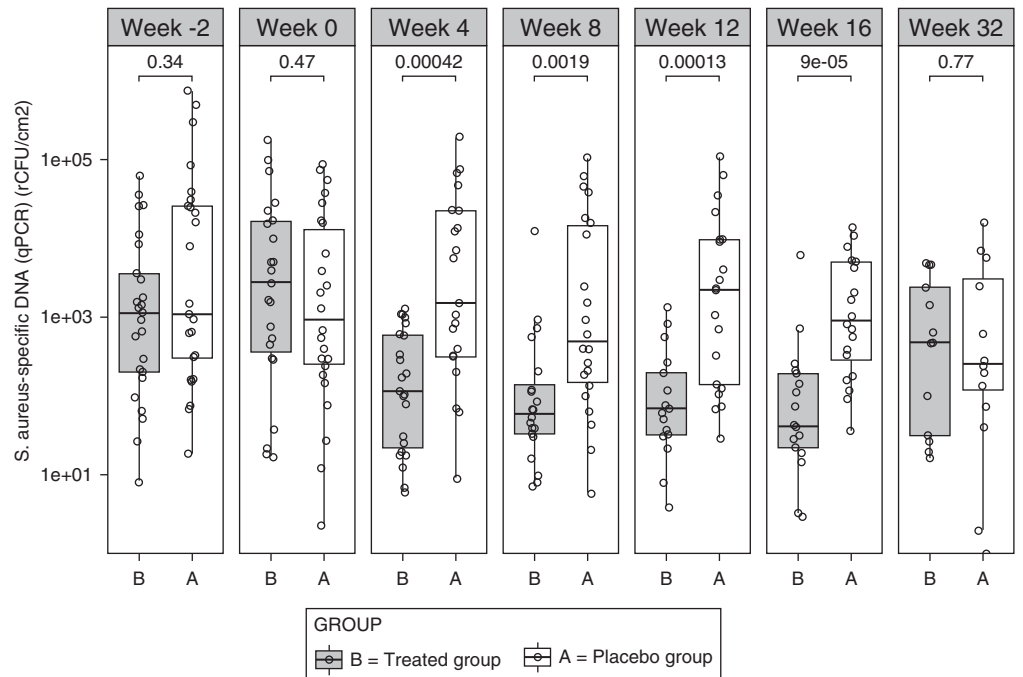

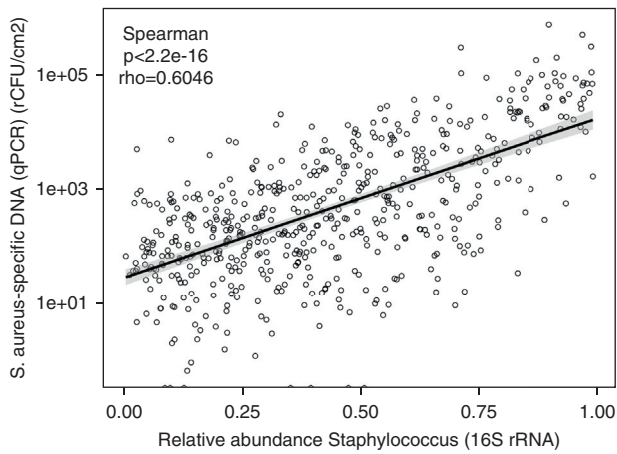

**Supplementary Figure S6.** Correlation between quantitative PCR (qPCR) detection of *Staphylococcus aureus* and relative abundance of *Staphylococcus* using 16S ribosomal RNA (rRNA) gene sequencing. qPCR, quantitative PCR; rCFU, relative colony-forming units; rRNA, ribosomal RNA.

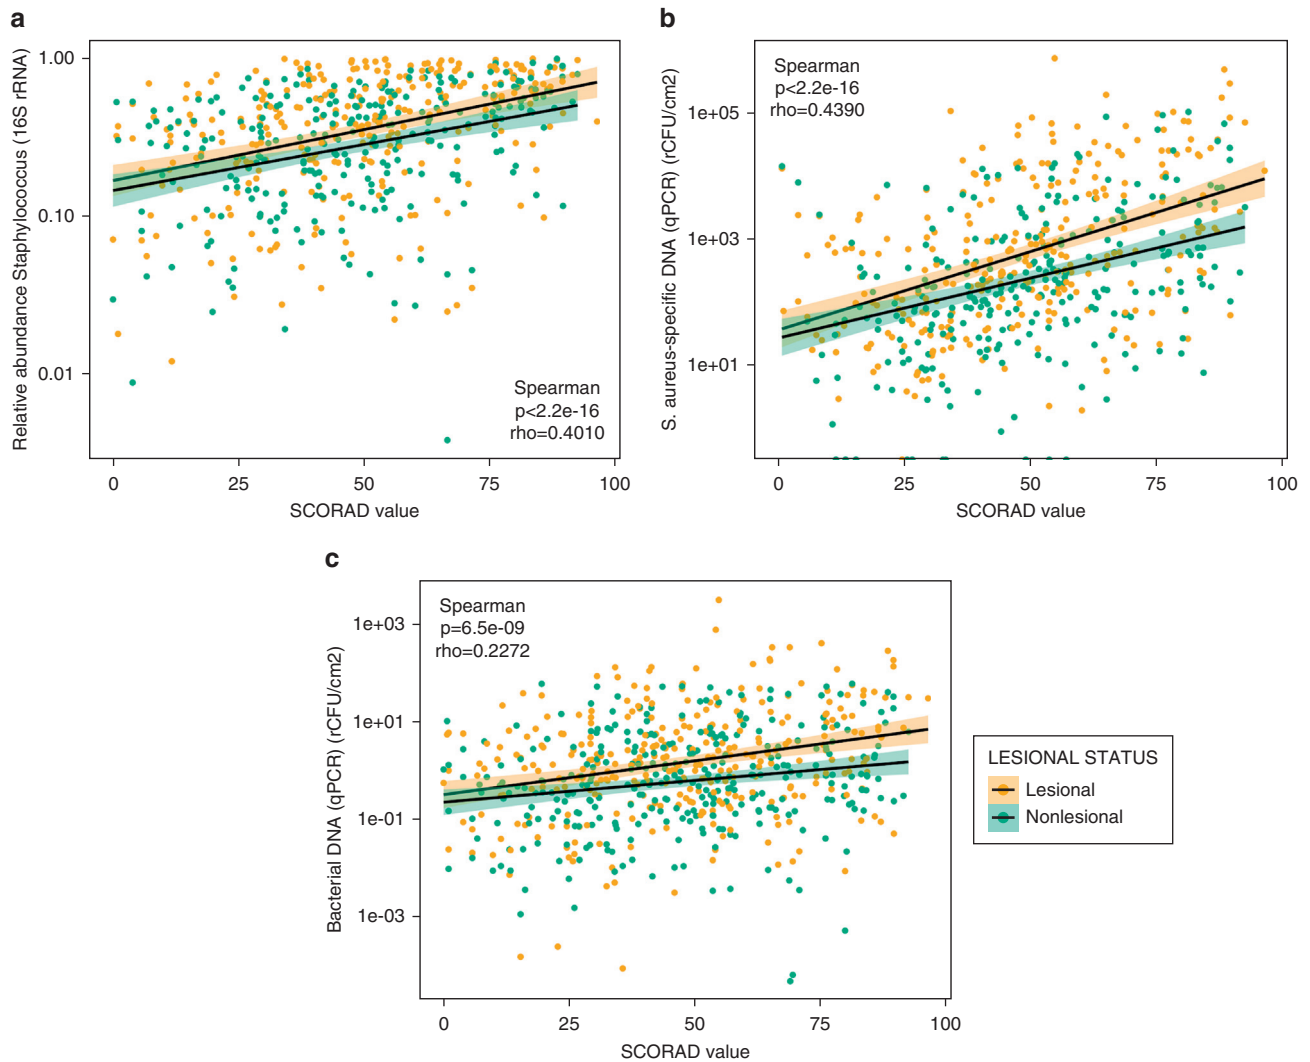

**Supplementary Figure S7.** Correlation of baseline Scoring Atopic Dermatitis (SCORAD) score and (a) relative and (b) absolute abundance of *Staphylococcus aureus* and (c) absolute abundance of all bacteria. qPCR, quantitative PCR; rCFU, relative colony-forming units; rRNA, ribosomal RNA.

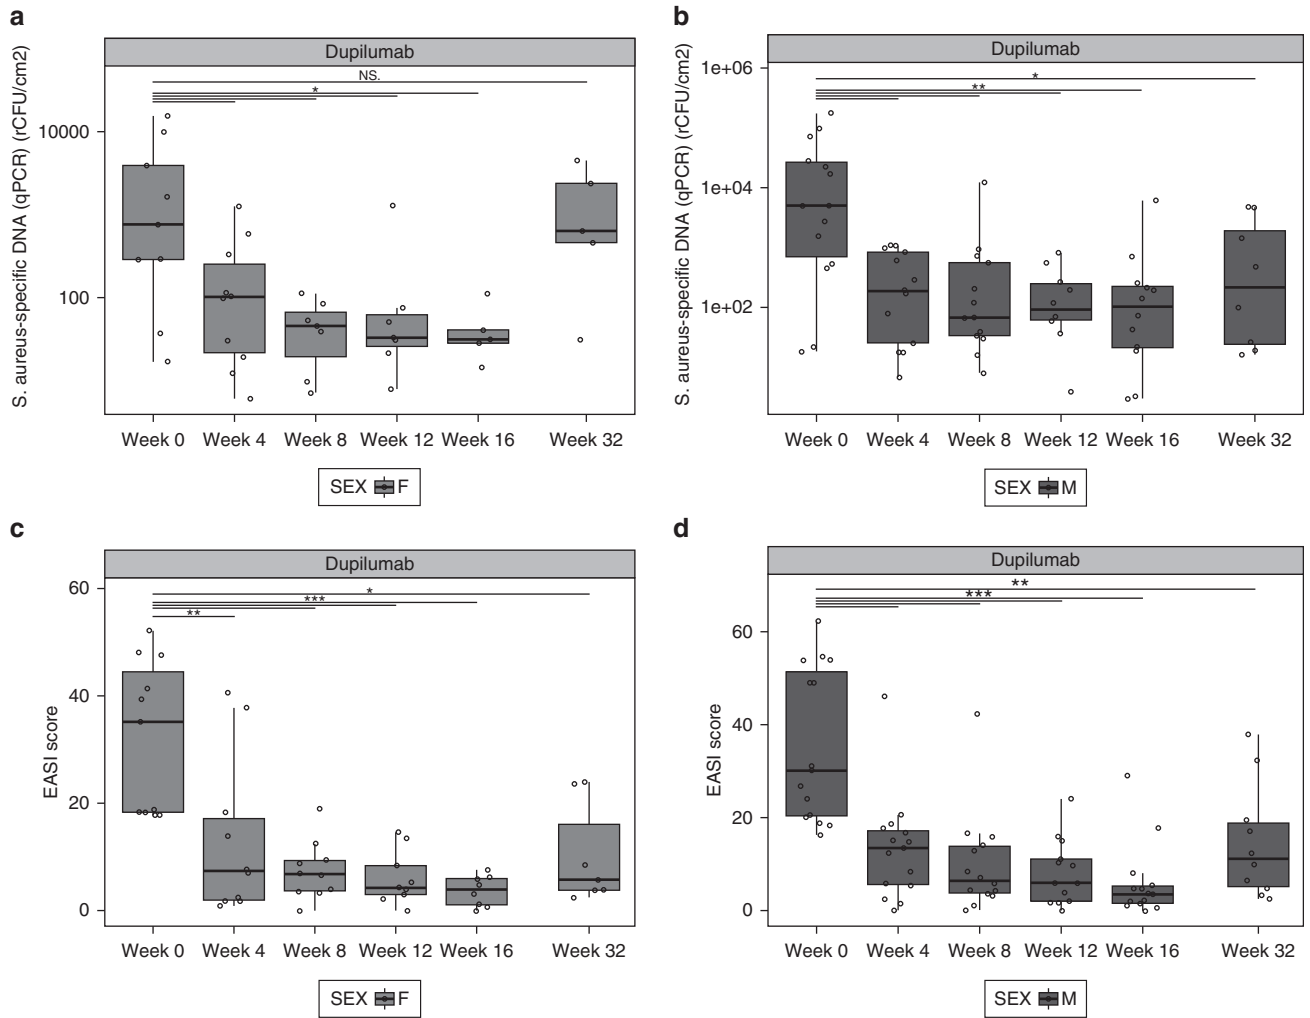

**Supplementary Figure S8.** Absolute abundance *Staphylococcus aureus* and EASI scores over time in lesional skin samples of dupilumab-treated group for (a, c) female and (b, d) male subsets. Statistical differences in *S. aureus* abundance and EASI scores versus baseline were assessed using the nonparametric Mann–Whitney U test, with Bonferroni correction for multiple comparison. \* $P < 0.05$ , \*\* $P < 0.01$ , \*\*\* $P < 0.001$ . EASI, Eczema Area and Severity Index; F, female; M, male; qPCR, quantitative PCR; rCFU, relative colony-forming units.

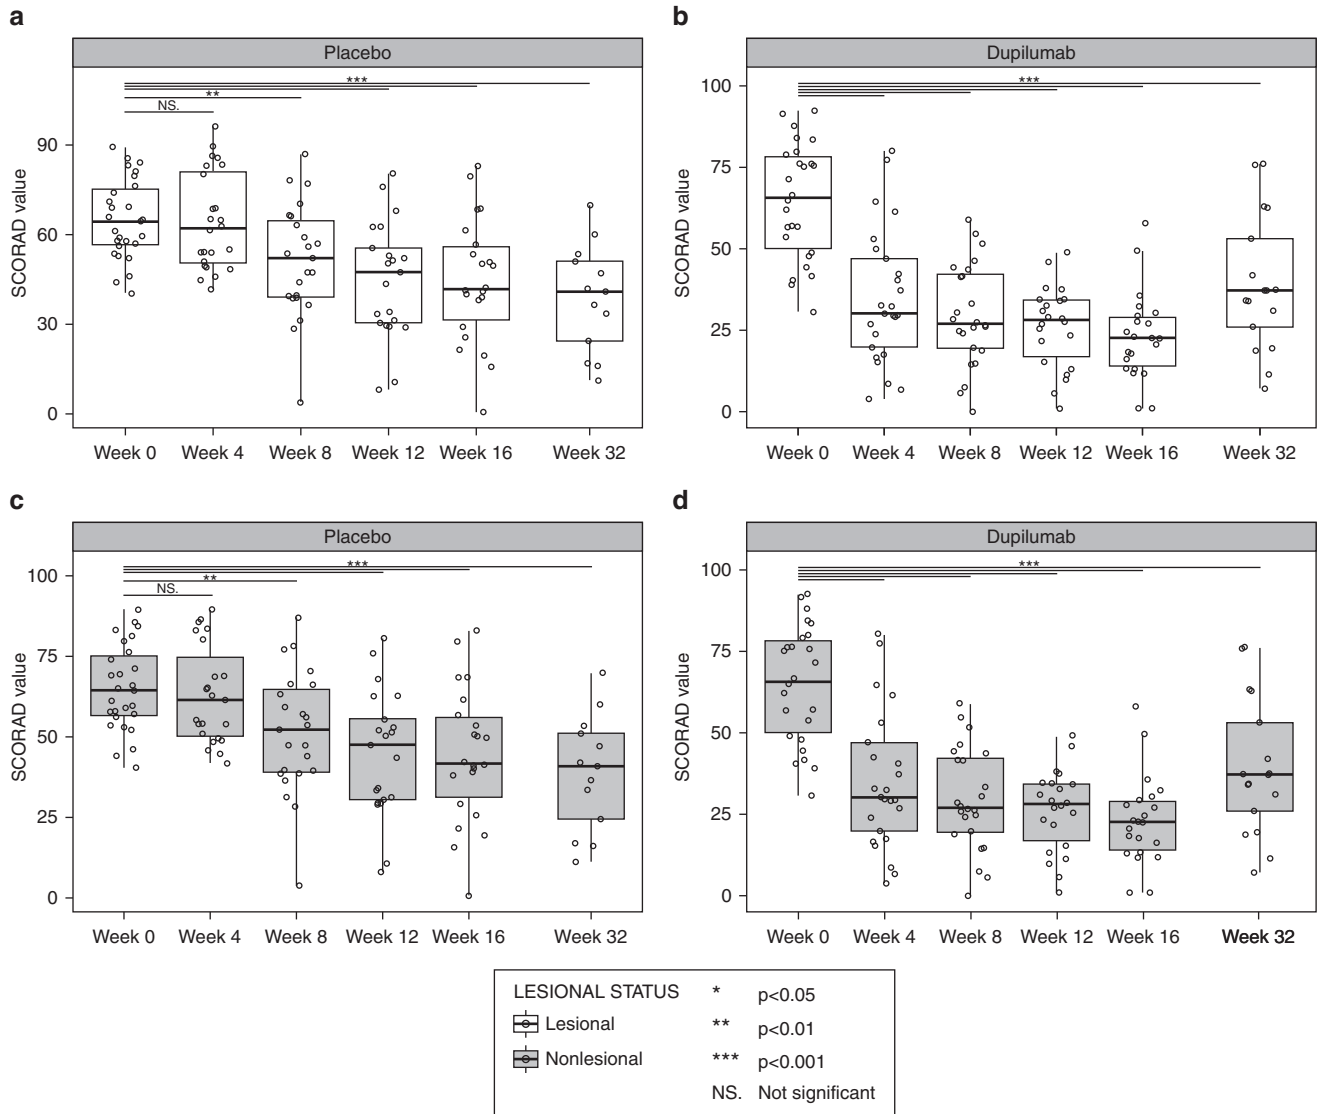

**Supplementary Figure S9.** SCORAD, score over time in (a) placebo-treated and (b) dupilumab-treated lesional skin, and (c) placebo-treated and (d) dupilumab-treated nonlesional skin. Statistical differences with week 0 (baseline) were assessed using the nonparametric Mann–Whitney U test, with Bonferroni correction for multiple comparison. SCORAD, Scoring Atopic Dermatitis.
